# Supplementary material for: Straightforward synthesis of model polystyrene-block-poly(vinyl alcohol) diblock polymers
Source: Royal Society of Chemistry journal article supplement (doi:10.1039/c8py00937f), 2018-01-01
Supplement: c8py00937f1.pdf [file c8py00937f1.pdf]

## **Supplementary Information**

### **Straightforward Synthesis of Model Polystyrene-block-Poly(vinyl alcohol) Diblock Polymers**

Ozcan Altintas,<sup>a</sup> Joshua C. Speros,<sup>b</sup> Frank S. Bates<sup>c</sup> and Marc A. Hillmyer<sup>a\*</sup>

<sup>a</sup>Department of Chemistry, <sup>c</sup>Department of Chemical Engineering and Materials Science,  
University of Minnesota, Minneapolis, Minnesota 55455, United States

<sup>b</sup>BASF Corporation, 339B Hildebrand Hall, Berkeley, California 94720, United States

\*Corresponding author (e-mail: hillmyer@umn.edu)

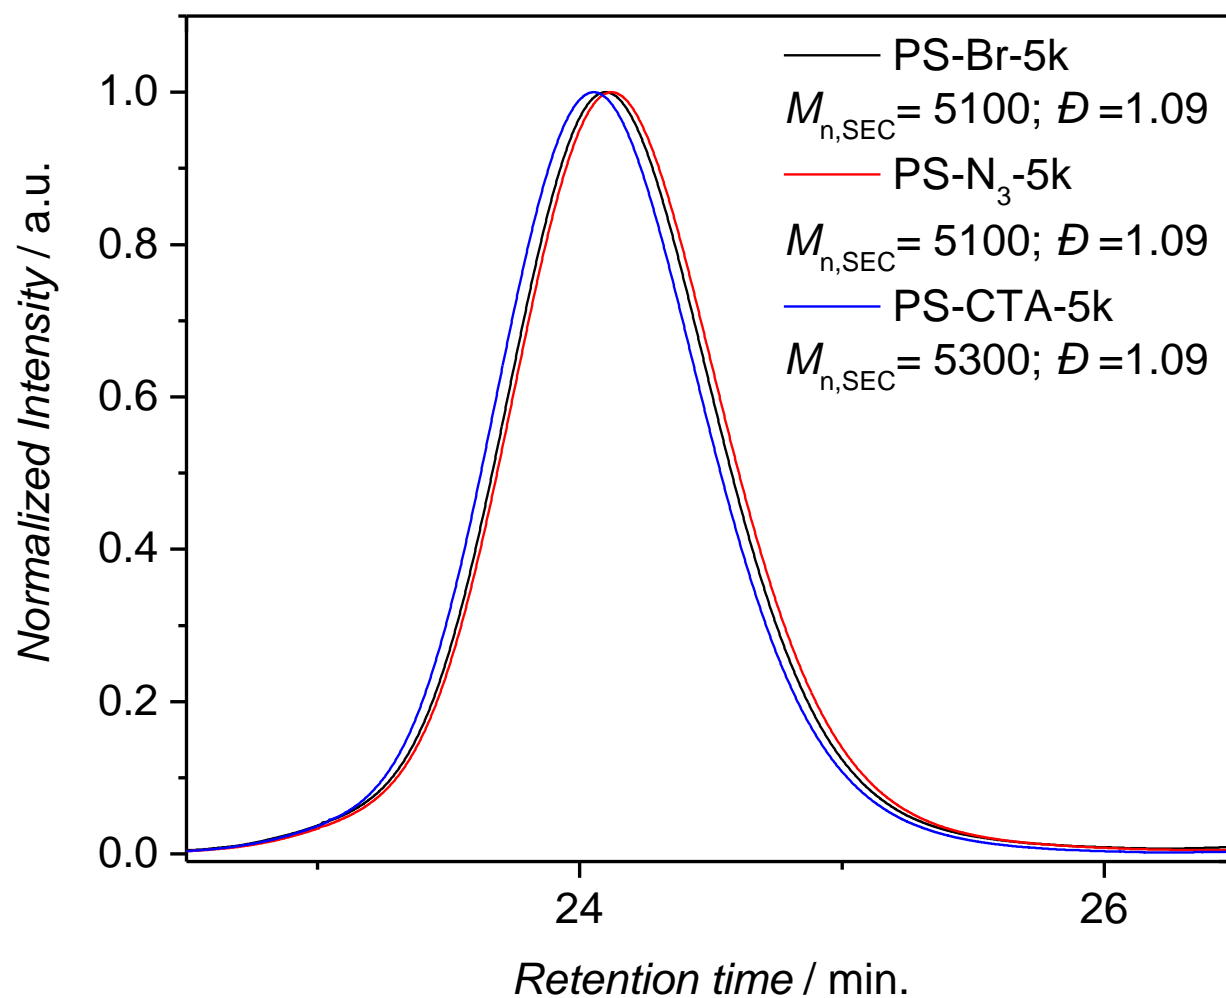

**Figure S1.** SEC traces of the precursor polymers (PS-Br-5k, PS-N<sub>3</sub>-5k, PS-CTA-5k) using CHCl<sub>3</sub> as the eluent and calibrated with polystyrene standards.

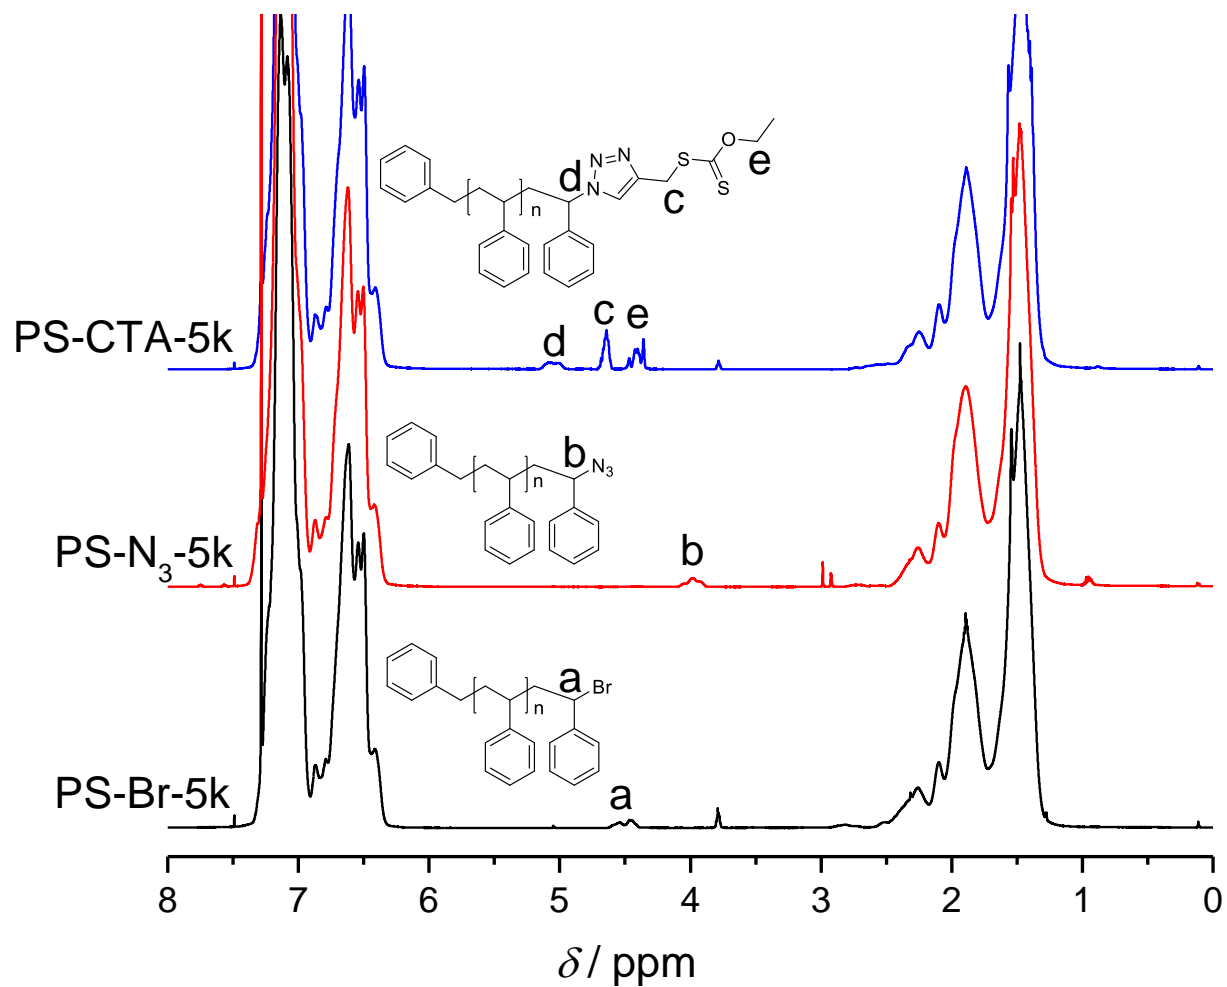

**Figure S2.**  $^1\text{H}$  NMR spectra of the precursor polymers (PS-Br-5k, PS-N<sub>3</sub>-5k, PS-CTA-5k) in  $\text{CDCl}_3$  at the ambient temperature.

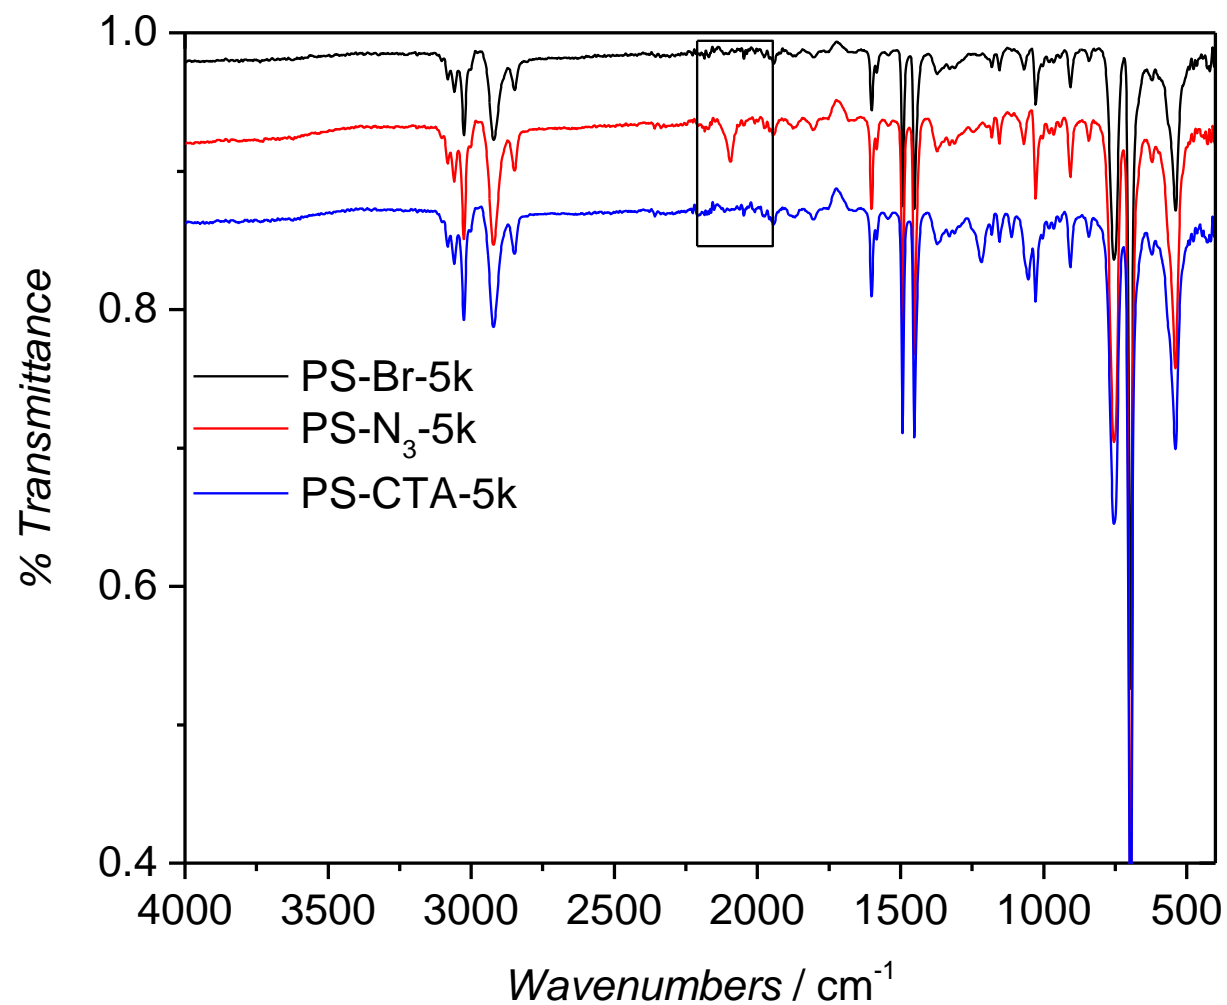

**Figure S3.** FT-IR spectra of the precursor polymers (PS-Br-5k, PS-N<sub>3</sub>-5k, PS-CTA-5k).

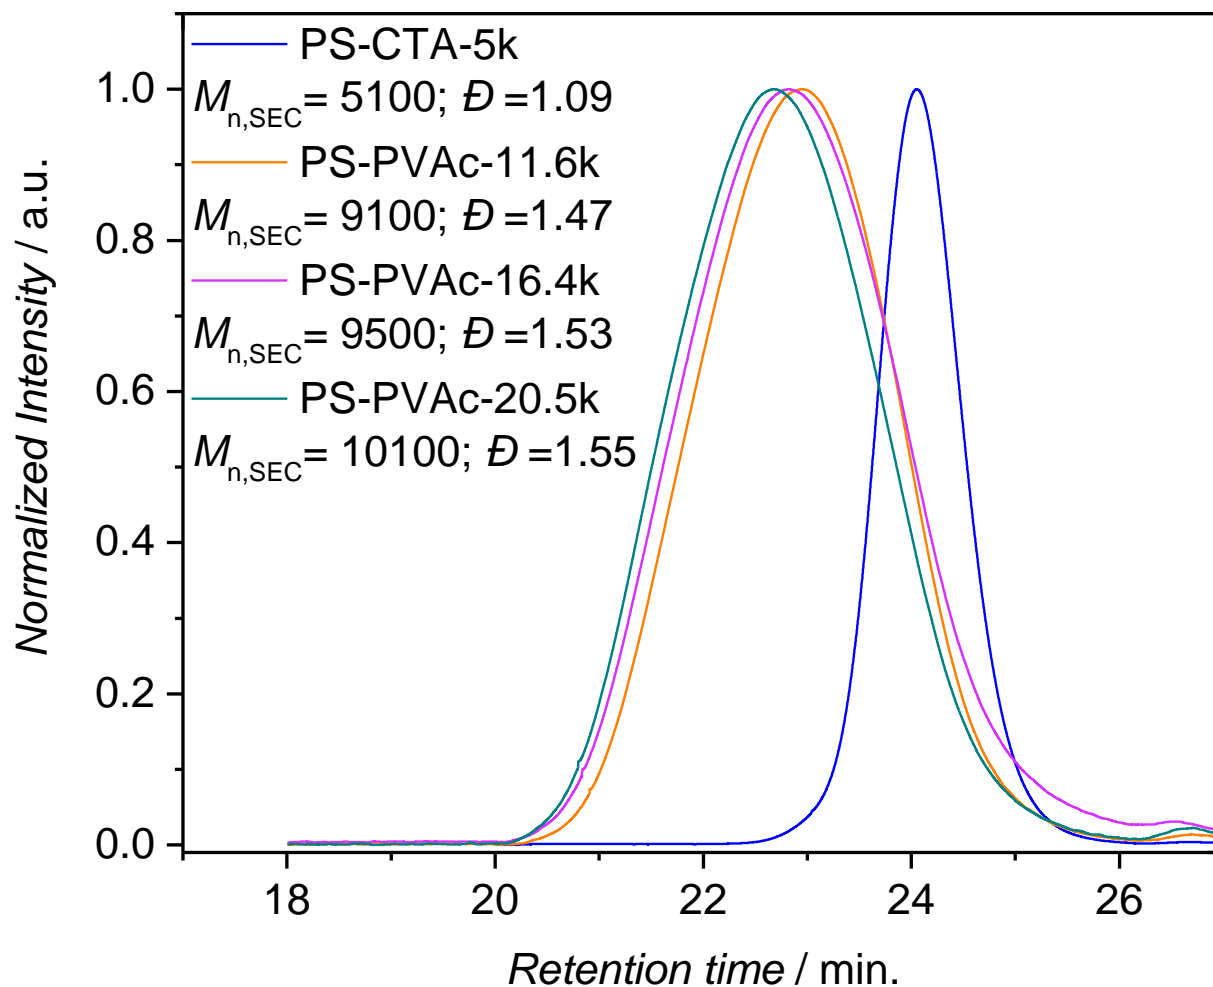

**Figure S4.** SEC traces of diblock block polymers (PS-PVAc-11.6k, PS-PVAc-16.4k, PS-PVAc-20.5k) and the precursor polymer (PS-CTA-5k) using  $\text{CHCl}_3$  as the eluent and calibrated with polystyrene standards.

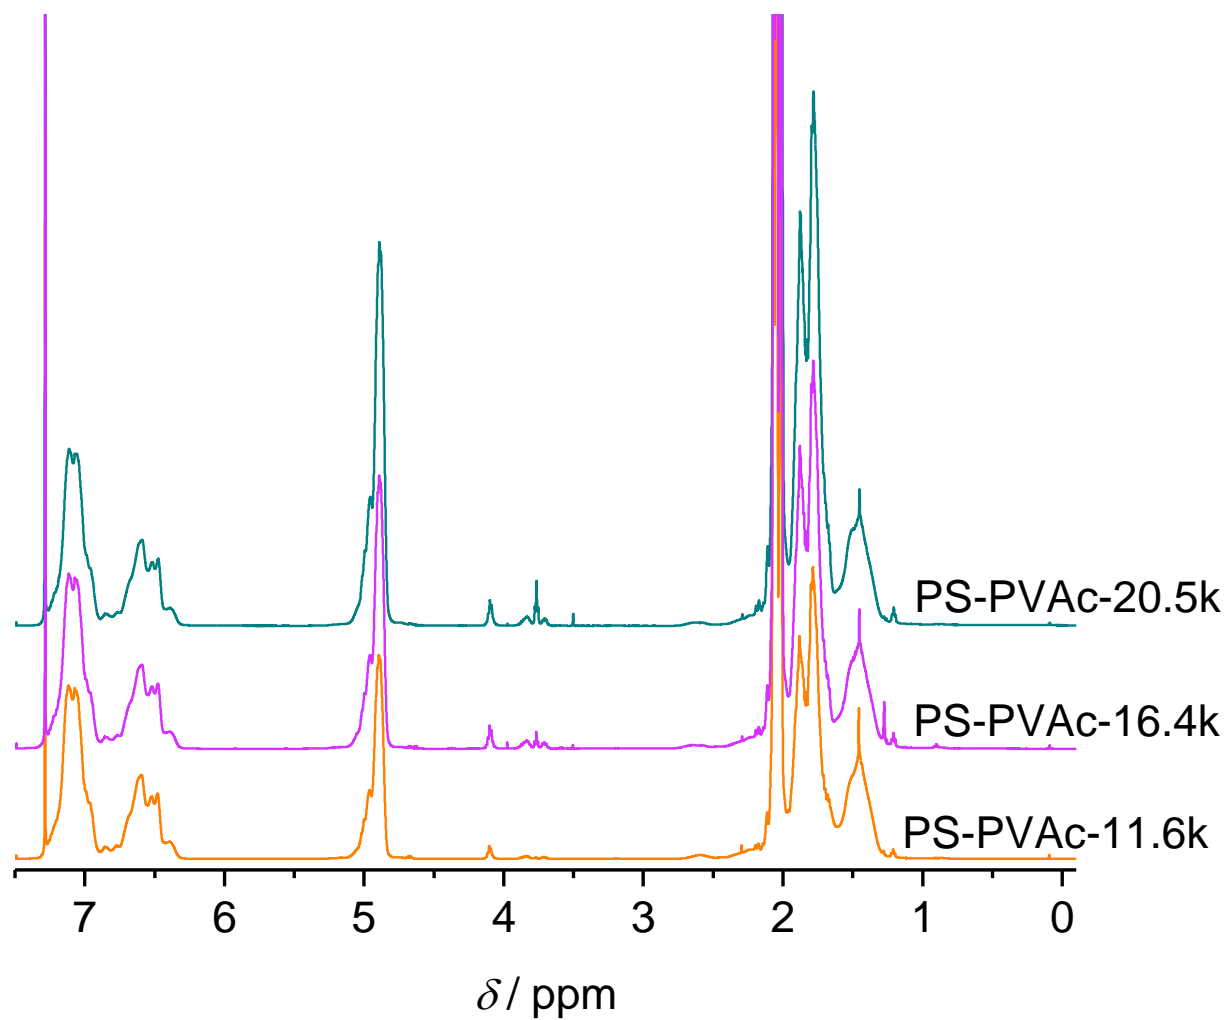

**Figure S5.**  $^1\text{H}$  NMR spectra of diblock block polymers (PS-PVAc-11.6k, PS-PVAc-16.4k, PS-PVAc-20.5k) in  $\text{CDCl}_3$  at the ambient temperature.

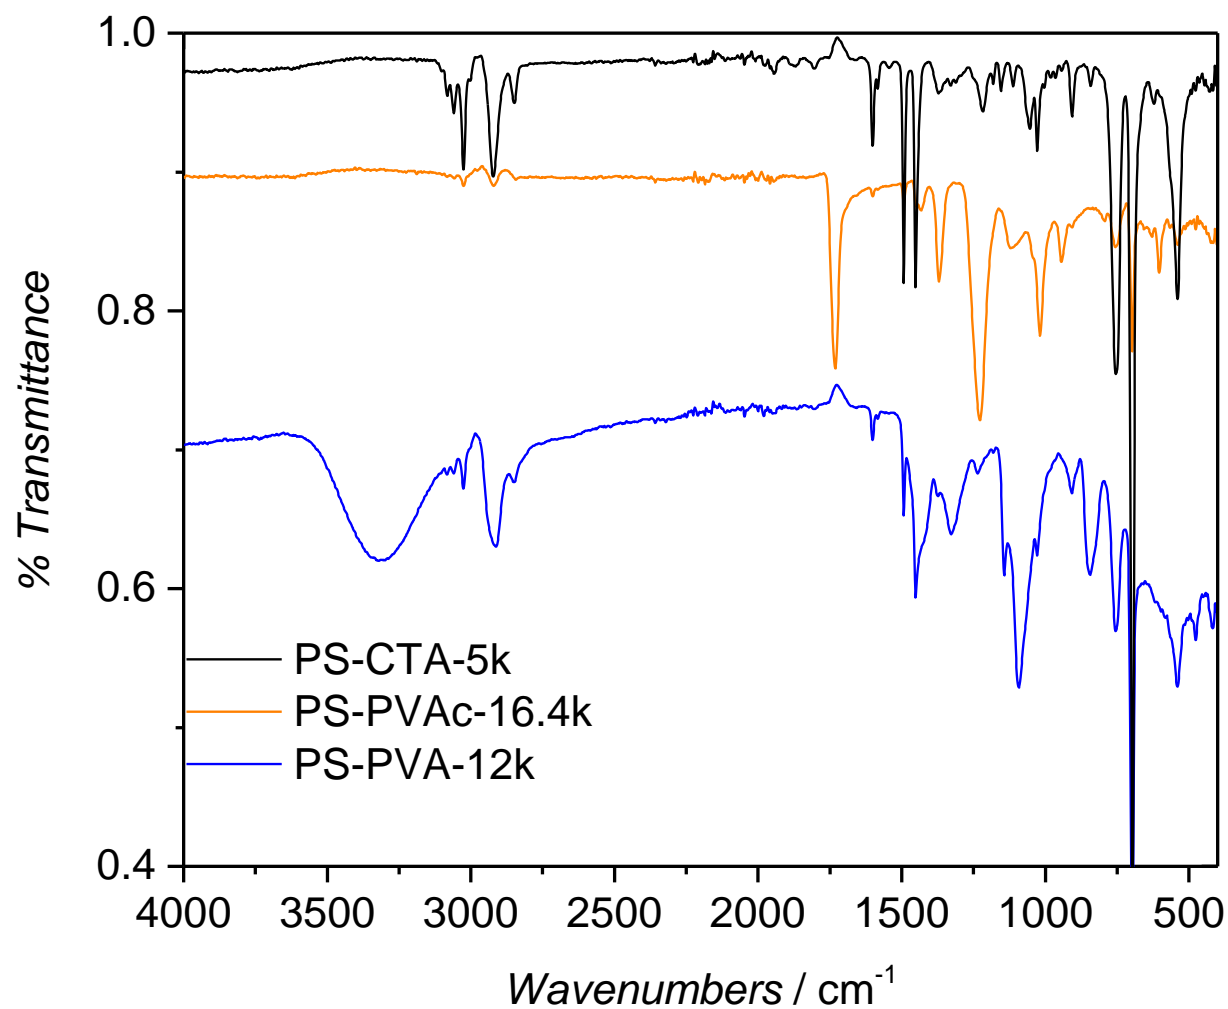

**Figure S6.** FT-IR spectra of the diblock block polymers (PS-PVA-12k and PS-PVAc-16.4k) and the precursor polymer (PS-CTA-5k).

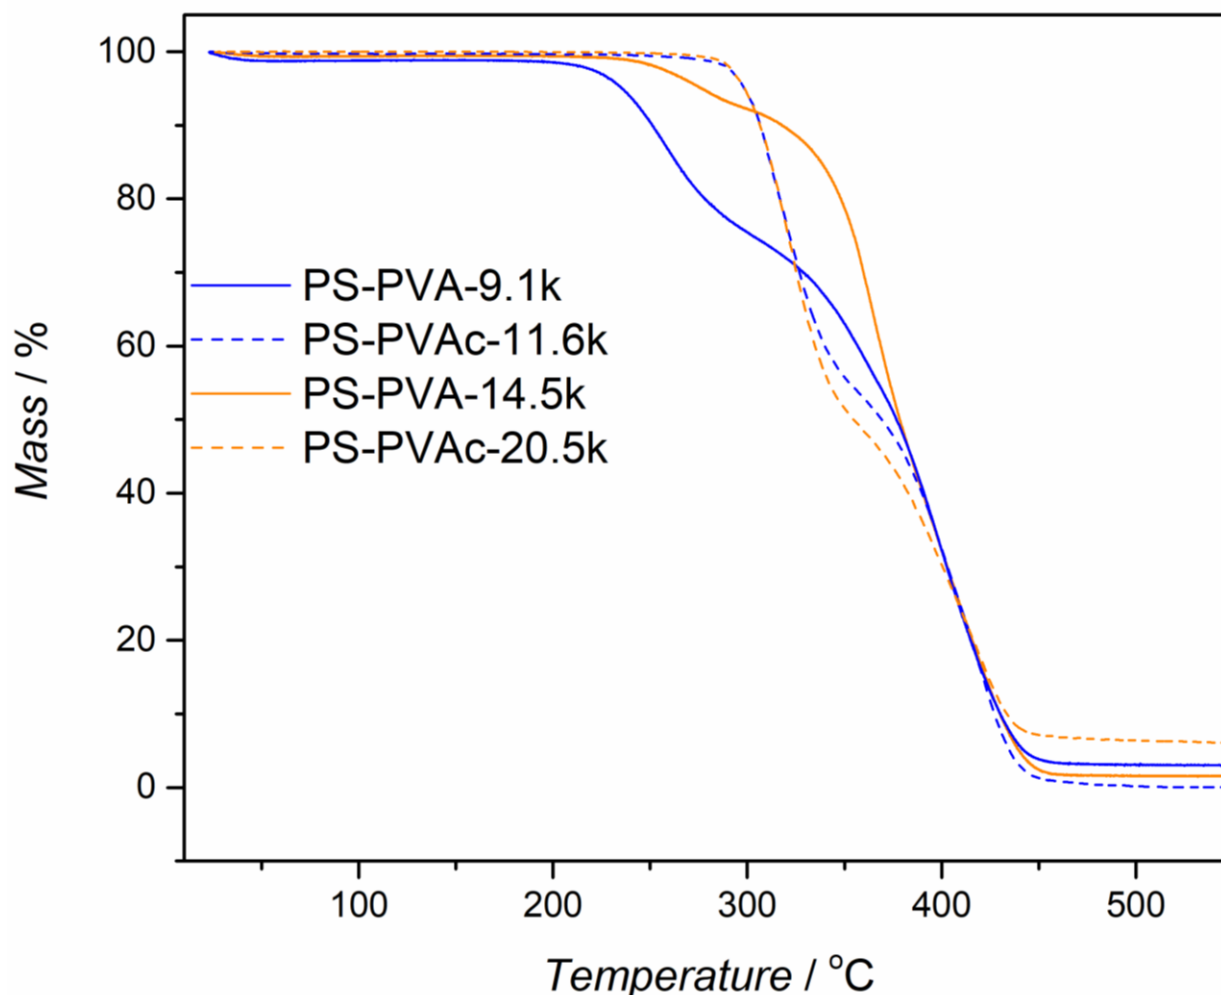

**Figure S7.** Thermogravimetric overlay of the diblock polymer and corresponding precursor diblock polymer heated at a rate of  $10\text{ }^{\circ}\text{C}\cdot\text{min}^{-1}$  under nitrogen atmosphere.

Atomic force microscopy (AFM) was utilized to investigate the surface structures of spin coated PS-PVA films. As a representative sample, the thin film assembly of the PS-PVA-12k block polymer was examined. A solution of the PS-PVA-12k block polymer was prepared with concentration of  $25\text{ mg}\cdot\text{mL}^{-1}$  in dimethylacetamide at  $85\text{ }^{\circ}\text{C}$ . Thin films of the PS-PVA-12k sample were prepared on a silicon wafer with a native oxide layer by spin-coating from the hot solution. The thickness of the polymer film was around 35 nm as estimated by ellipsometry.



After keeping the sample at 230 °C for 1 min under nitrogen atmosphere above the melting temperatures of the PVA chains, the thin film was annealed under nitrogen atmosphere at 180 °C for 16 h above the recrystallization temperatures of the PVA chains (Figure S8). The AFM images of a  $1\ \mu\text{m} \times 1\ \mu\text{m}$  scan area of the substrate coated with the PS-PVA-12k block polymer do not reveal clear morphology patterns (Figure S9).

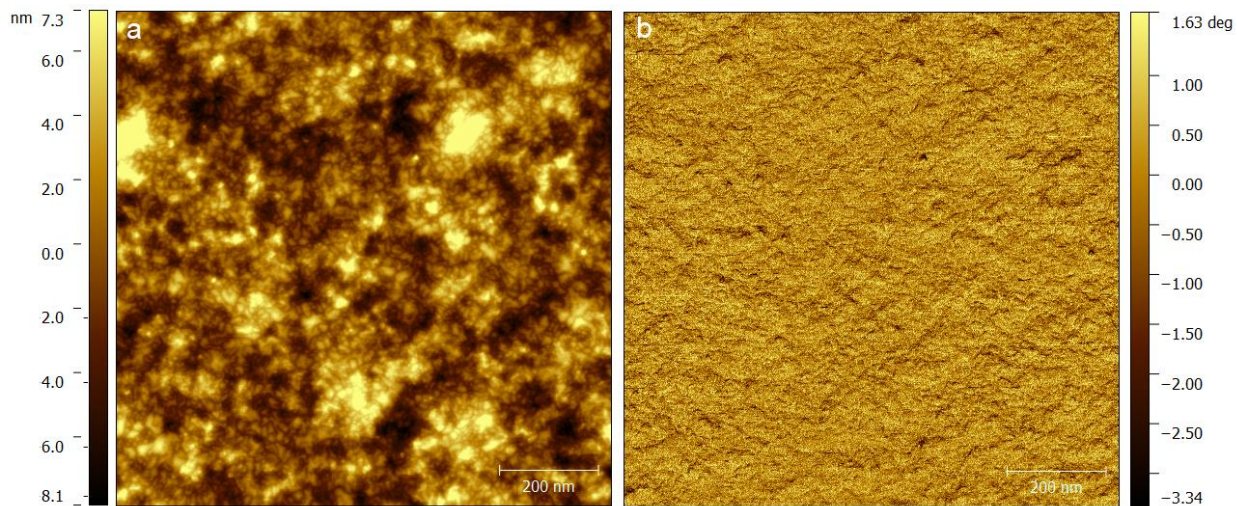

**Figure S8.** AFM height (a) and phase (b) images obtained in tapping mode of PS-PVA-12k,  $T_o = 34\ \text{nm}$ , thin film using Bruker's Peak Force tapping mode.  $T_o$  is the thickness as measured by ellipsometer. The thin film on the bare silicon wafer was melted at 230 °C for 1 min and then annealed at 180 °C for 16 h.

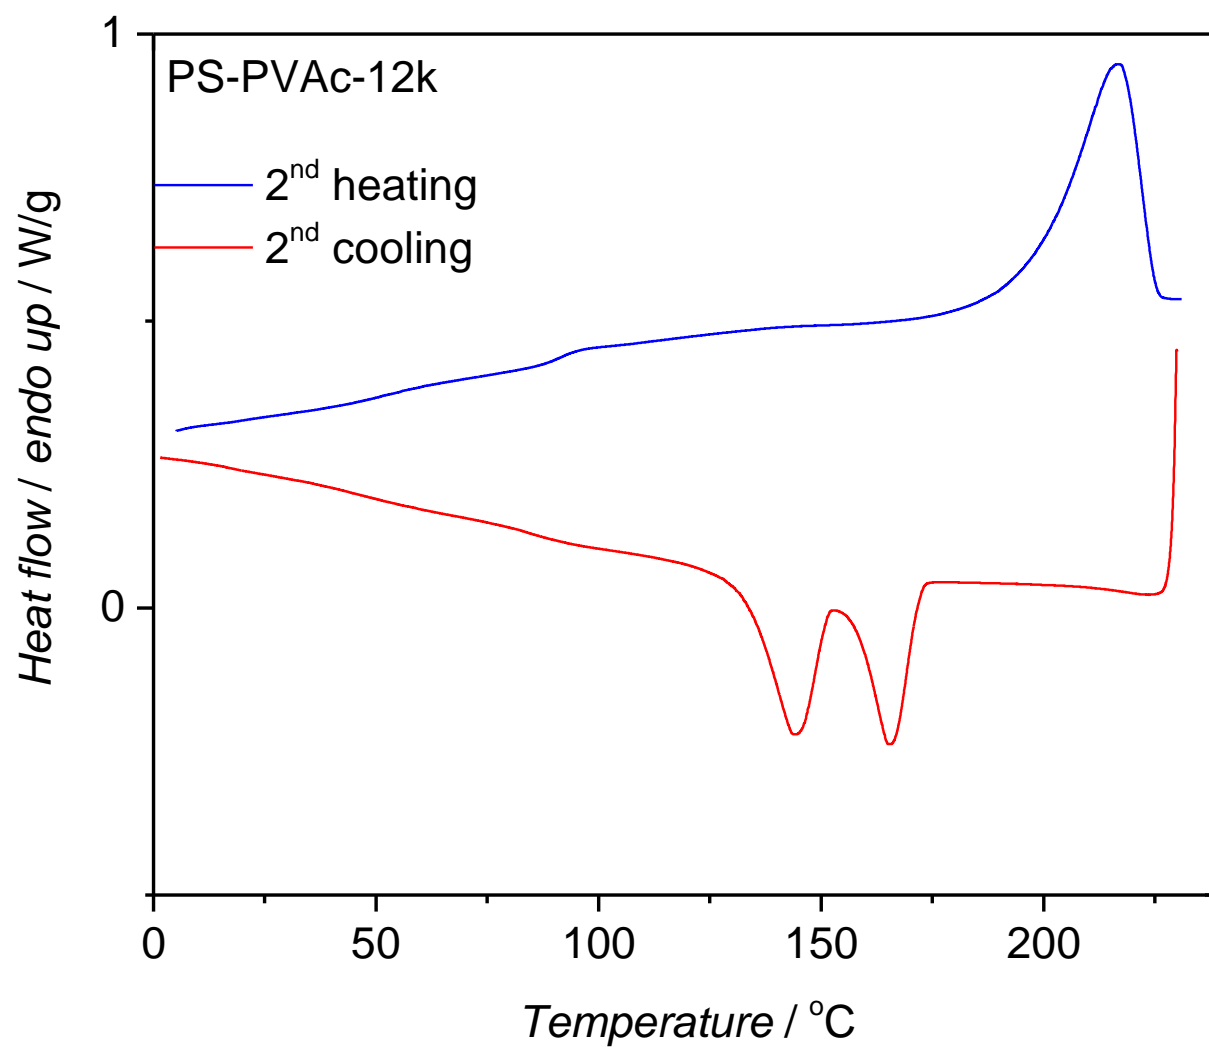

**Figure S9.** DSC thermograms for PS-*b*-PVA block polymer (PS-PVA-12k). Each thermal scan was taken at a rate of 10 °C·min<sup>-1</sup> upon a second heating as well as cooling.
